# Supplementary material for: Attribution of recent increases in atmospheric methane through 3-Dinverse modelling
Source: Copernicus journal article supplement (doi:10.5194/acp-2018-474), 2018-06-25
Supplement: Supplementary file [file acp-2018-474-AC1-supplement.pdf]

## Response to reviewers' comments

We would like to thank the reviewers for their helpful comments. These are repeated below (in italics) followed by our responses.

### Reviewer 1

*My main demands are (see specific comments) - to rewrite sections 3.2 and 3.3 clearly presenting and separating results & analysis of o mean emission and sinks versus their changes, o results & analysis global scale versus regional o results & analysis of emissions versus the sinks - to comment on all emissions (anthropogenic microbial emission poorly commented) - to report emission changes in Tg/yr between 2 time periods and not in trends (Tg/yr<sup>2</sup>), - to add a table with emissions changes, - to add a discussion section where comparison with other studies can be grouped.*

We agree that both section 3.2 and 3.3 could be made clearer by providing more details and separating the results as follows:

- Prior and posterior comparison.
- Posterior trends both globally and regionally.
- Source and sink attribution from inversion.
- Integrate sensitivity.

We agree that the reviewer suggestions will improve the manuscript significantly and thank him/her for them. We have addressed the following specific comments relating to the general remarks above.

*P2 L15-20: Please note that these mean isotopic signatures are associated with rather large range. It may be worth writing also that total source signature is -51/-53‰.*

We have included the total source signature as suggested and highlight the categories given are in a broad range.

*P2 L25: "although they emphasised that the problem is not very well constrained by existing data I suggest to be more precise: although these two studies cannot discard the hypothesis that OH is not changing.*

We agree that the discussion of the conclusions drawn by Rigby et al., 2017 and Turner et al., 2017 was not detailed enough and as a result we have now also commented that their results could not discard the hypothesis of no OH change.

*P3 L5: please define shortly here "synthesis inversion" (3D modelling, reduction of the size of flux and observation spaces to solve the inverse problem, ...) focusing on the improvement compared to box models.*

We agree that giving a short sentence describing the synthesis inversion and comparing it to box models would be useful here. This has been included.

*P3 L18: what is a one-year inversion spin-up? please detail a bit.*

We have appended the sentence to explain the one year spin-up is used to optimise the model CH<sub>4</sub> and δ<sup>13</sup>CH<sub>4</sub> concentration fields relative to the observations.

*P3 L21-22: what is the influence of this choice? what do you take for geological emissions ? It might be worth making a sensitivity test by taking the values from Saunois et al (2016) (update of the Kirschke paper, please quote) instead of the Schwietzke paper.*

We agree that the relevance to the Kirschke study is outdated and we have updated the reference to the more recent Saunois et al. study. The decision to scale to Schwietzke et al. estimates was based

on their development of isotope source signatures, which we felt was relevant for this paper. However, we agree that the Sauniois et al. study provides more thorough estimates, and a sensitivity study using both estimates would be interesting, a comparison of the budgets between the two studies is however beyond the scope of this work.

*P3 L26: I would be worth mentioning which of your sources is prescribed in the prior with interannual variability. Maybe in Table 1.*

OK. We have updated Table 1 to include which source/sinks vary interannually.

*P3 L30: I understand that you compute monthly response functions using the forward model? Please specify this here.*

Yes. We have updated the text to specify the monthly emissions can be used to assess variability.

*P4 L5: Why increasing OH and CI? Please justify this choice?*

By adjusting the OH, the sensitivity can be diagnosed, and this sensitivity remains the same whether fields are increased or decreased. A small feedback is present in the model setup due to CH<sub>4</sub> loss rate being dependent on CH<sub>4</sub> concentration. To reduce the impact of this, the sensitivity simulations only adjust the OH concentrations by a small amount (1%). This has been added to the text.

*P4 L9-10 and P5 L9-14: Not clear. How do you deal with the long-term equilibration of 13CH4 (e.g. Tans 97 paper) with 1-yr inversions?*

The inversions are performed for monthly emissions, although the total inversion length (13 years) comprises a series of the 1-year inversions mentioned. We have included that the 1-year inversions are performed for computational reasons, and by rerunning the forward model with posterior fluxes we are able to provide initialisation fields for the subsequent year. In effect, this serves as a single 13-year inversion for the purpose of long-term equilibration, because the previous year posterior fluxes influence future concentration fields. The posterior fluxes are not influenced by observations beyond the 1 month window; however the timescale of changes in the isotopic signature are still captured by the inversion.

Our results suggest that given the source signature change in the total posterior emissions from 2007, the response time of atmospheric  $\delta^{13}\text{CH}_4$  is comparable to that of CH<sub>4</sub> at the spatial scales resolved in this study. This suggests the long-term equilibration of  $\delta^{13}\text{CH}_4$  shown by Tans (1997) using a box model approach is not applicable to the 3D CTM used here.

*P4: I understand that isotopic signature are not optimized in this procedure. Please precise this point.*

We agree that more details were needed. In the submitted paper there was a comment P12 L30 that mentions this, but we have added a new sentence on P4 to highlight this point.

*P5 L4-7: Bousquet et al 2011 addressed this point and tested a second iteration with only small impact on the inversion results, so consistent with your hypothesis. It might be worth quoting.*

We thank the reviewer for pointing this out and have updated the text to include the finding of Bousquet et al. (2011).

*P5 L9: "The model OH is constrained by CH4 and  $\delta^{13}\text{CH}_4$ ": this is a weak constraint as many combination of total source and mean OH can fit the atmospheric changes. Please notice it here? With such a configuration you largely depend on the prior for the mean emissions and sinks so I would not insist a lot in the paper on the posterior versus prior comparison but more on budget changes with time and between your different inversions.*

We agree that multiple plausible emission/sink scenarios could exist to fit the observations, we highlight that a paucity of observations prevent a single solution. However, the 3D model approach,

over the box-model approach reduces the combination spread. We have updated the results and summary to remove the focus on prior v posterior and focus more on budget changes as suggested (Tables 4, 5 and 6).

*P6 L10-11: Putting only one value of uncertainty for all stations is a bit crude as model error will not be the same for remote sites of the southern hemisphere and continental sites of the northern hemisphere. More refinement is needed here or at least a sensitivity test varying observational errors.*

We agree that the magnitude of the model transport error will differ between sites, however the quantification of this transport error is beyond the scope of this work. We have added text outlining that the assumption is made as an estimate and not quantitatively derived.

*P6: It might worth doing a sensitivity test with more atmospheric observations, when appearing in the network. The apparition of stations is an issue but can help analysing regional gradients more safely. As you perform yearly inversions, why not adding each year the stations appearing in your inversions?*

We agree both approaches could be adopted. If we included additional sites as and when they became available, then we would gain more information from the inversion. We did not adopt this approach for the same reason as we did not use GOSAT retrievals in the inversion, intermittently adding observations would influence trend results and could result in disjointed posterior estimates, which result from the inclusion of new observations. Therefore, for long-term trend detection we opted not to append the observation set. For more accurate instantaneous posterior estimates we agree new observations should have been used, but as the key aim of the paper was to investigate the trend before and after 2007 we chose to omit new observations.

*P7 L22: "slow inter-hemispheric transport within the model": please provide the Inter Hemispheric Time and/or a reference for this possibly from Transcom experiments?*

We have added text referring to the Patra et al. (2011) Transcom study with reference to the Inter Hemispheric transport.

*P7 L27: For Garmisch did you try to extract the station at different level in your model?*

The averaging kernel is applied from the nearest model pressure level to the TCCON surface pressure and upwards, which is done to remove lower levels from the model output. It is possible that sub-grid scale variations in concentration due to orography, which are not accounted for due to smoothing in the coarse resolution model, is a cause of the model bias. We have not attempted to extract station information at different model levels due to the complex gradients related to orography and vertical profiles.

*P7 L29: 21.4 ppb is still a quite large value. Can you at least make hypotheses to explain them?*

We agree these are still relatively large errors, although they are more than halved relative to the prior and are approximately 1% of the concentration. A possible reason for this is that only surface observations are used in the inversion and not column information measured by TCCON. We have added text outlining this limitation.

*P8 – sect3.2: "OH concentrations in INV-FULL and INV-CH4 are relatively constant throughout the period 2007-2015 (Figure 5) but these values are smaller by  $1.8\pm0.4\%$  and  $0.3\pm0.5\%$ " : unclear : do OH is constant or diminishing. Please clarify. Also, I find a bit strange to start by the section by the sink and not by source changes.*

We agree it was somewhat unclear and have restructured the sentence to clarify that OH concentrations between 2007 and 2015 are constant but are lower relative to the previous years (2003-2006). In regard to structuring, the section has now been reformulated following the suggestions within this comment and the following comments.

*P8 L9-10: It may be good to refer to the sensitivity test on OH (S9) here.*

We agree the original structure could be difficult to follow. We have now referenced the sensitivity section here for completeness.

*P8 L11-15: Mixing the mean changes compared to the prior and the time changes from 2003-2006 to post-2007 period is confusing. What about change in agriculture flux? I suggest to group discussions on the mean sources and sinks global and regional (table 4) and then address the changes (table 5).*

We have rewritten this section to clearly separate out mean attribution and trends in sources and sinks.

*P8 L24: How did you estimate the 30% for OH and 60%/10% values? Did you use S9? Please justify.*

We agree this was not made clear in the results, and we have updated the text to explain. The inversion results were used in a simple box model to attribute contributions of each source and sink to the observed CH<sub>4</sub> trend. The details of the box model are found in McNorton et al (2016b).

*P8: The choice to report changes in trends (Tg yr<sup>-2</sup>) is a bit technical. A suggestion would be to report emission change between two periods (e.g. 2003-2005 and 2012-2015) in Tg/yr and quantify the % of contributions from this.*

We agree that reporting the results as the shift between the two periods is clearer. As the reviewer mentioned the structure of the section did not flow and this was one of the reasons. As a result, we have restructured the section to bring these two sets of analysis into the same part. We have kept the more technical growth rates (Tg yr<sup>-2</sup>), as they provide information about the rate of change, but have also now included Tg/yr and the % contribution.

*Table 5: There are some values worth to comment in your analysis: increase emissions from NA? dipole +0.59 / -0.58 for energy between NA and EA? wetland increase in Eurasia? Why? visible in other studies?*

The inversion ability to constrain NA and EA energy sector emissions independently reveals potential issues as discussed in Section 3.2. As a result, we have added in two sentence to describe a potential limitation in the model inversion system when used to distinguish between NA and EA energy sector emissions. The spatial distribution in wetland trends from previous studies remains uncertain and as a result is not used to inform the results of this study.

*Section 3.2: You do not comment waste sector (+0.46 in your table 5). Indeed, anthropogenic microbial emission contribute almost as much as wetlands (0.46 and 0.2 trends globally versus 0.8 for wetlands). Please add comments on anthropogenic microbial emission changes.*

We agree that whilst the magnitude of the waste emission changes is not as large as either energy sector or wetland changes, the relative change is larger and therefore should be commented on. We have now included this in our results.

*P9 L5-9: You have very few stations constraining NA inland emissions. It should be notices here as the increased inferred emissions over NA is a hot topic. Again including NA inland stations in a sensitivity inversion seems necessary to confirm such a result. In any case this has to be commented here.*

We agree the sparse observations over NA and EA may be the cause of some of these anomalous results, we have added this in as a caveat to the results.

*P10: It is a bit difficult to follow all the trends provided and to compare them to the standard inversion. I suggest to make a table with results of sensitivity test for global scale compared to INV-FULL (in Tg/yr difference between 2 periods and not trends in Tg/yr<sup>2</sup>). Then you can more clearly comment on the differences in the main text.*

We agree and have added this table in as Table 8, the results discussion now reflects what is shown in the table for clarity.

*P10 L7: “the magnitude in post-2006 changes is typically increased in S9”, please add something like: which is normal considering that constant OH as compared to decreasing OH in INV-FULL requires more emission change to match atmospheric observations.*

We agree that this point should be made clear, i.e. that the results are expected due to the removal of the OH sensitivity. We have added a line explaining this.

*P10 L21-22: Again, please acknowledge here that global total OH versus total emissions are not very well constrained without an external proxy as many combination can match the growth rate. You largely rely to the prior in this case so I would not insist a lot on the posterior versus prior comparison but more on budget changes with time and between your different inversions.*

We agree that the paper needed to focus more on the trend/shift over the period and less on the comparison with the prior. We have added a comment here and elsewhere in the paper to emphasise this point.

*P11 L15-30: This comparison with EDGAR should be in a discussion section between 3.3 and conclusions where you could compare your results with other studies. More references to previous results would be good e.g. Pouter et al. 2017 for wetlands, Saunio et al., 2017 ACP for all sources, more precise comparison about OH with Rigby and Turner papers.*

We agree that the ordering of discussion is confusing and have changed it as suggested. We have included reference to Saunio et al., (2017). Poulter et al. is not included because it only covers a subset of the period studied. We have also given quantitative comparisons to the Rigby and Turner papers.

*P11 L21-22: “As a result emissions from these regions are influenced by posterior emission changes and assumed to be underestimated in both magnitude and growth rate in the prior” : unclear to me, please rephrase.*

We agree this sentence is not clear. We have modified it to describe that the inversion system can attribute fluxes and trends at a regional level, but cannot diagnose spatial patterns at a sub-regional scale (for example national).

*P11 L27: I do not see this -2.2 Tg/yr<sup>2</sup> in Table 5? Please clarify.*

We agree this was not clear. We have clarified that the EDGAR comparison is for 2003-2012, when EDGAR data are available, while the figure in Table 5 (-0.58 Tg/yr<sup>2</sup>) is for 2003-2015. The EA energy sector emissions appeared to rebound slightly in later years.

*P12 L11: You do not believe your results? This sentence introduce confusion. Please rephrase it or remove it.*

OK. We have modified the sentence to state that whilst our findings provide the most likely explanation for the cause of the renewed growth, an alternative scenario could exist whereby OH remains unchanged; however, this is considered less likely.

*P12 L13: Saunio paper is not an inventory by a synthesis of inventories and inversions. Please rephrase.*

We agree we did not describe the Saunio paper correctly. We have modified this to explain the combination of inventories and top-down studies.

*P12 L27: Limitation of synthesis inversions (monthly means, coarse regions...) should also be mentioned here.*

We agree this is a caveat to the study and have added this in.

*P12 L31: What about NO<sub>2</sub> decrease in Asia in the late 2000s? Please mention this hypothesis as well.*

We have included a reference to the decreased NO<sub>2</sub> growth rate in the late 2000s, which approximately coincides with the renewed CH<sub>4</sub> growth.

## **Reviewer 2**

*What is the rationale for the regional division applied in the transport model and the inversion? Especially the large EA and AO emission regions combining countries and regions with very different socio-economic developments in the last decades are very questionable choices. As the inversion is set up right now it can, for example, not distinguish between Western Europe with well-established and generally decreasing CH<sub>4</sub> emissions from most sectors from emissions in Russia or North-East Asia. These are areas with potentially growing emissions from different sectors in the last decades. Although, these trends may be presented in the a priori it seems more likely that there are uncorrelated uncertainties in the emission estimates for these areas. Similar arguments can be found for a required sub-division between south-east Asia and Australia. In the end, the current sub-division alters the derived regional trends in the a posteriori emission very questionable. For example, opposing regional errors in the a priori trends in these large regions may alter it impossible for the inversion to correctly correct these trends. Instead the missing/excessive emissions may be laid down in/removed from regions for which little direct constraint is available from the utilised set of observations, but only a more global sensitivity exists in the model (such as the AM region). Maybe not surprisingly these are the regions for which the authors find the strongest changes in a posteriori emissions, a result that somewhat differs from conclusions in previous work. The regional sub-division certainly needs some further justification. This could be done by a more in-depth validation of the model performance at surface sites in contrasting areas like Europe vs. East Asia. For this the use of additional surface observations should be considered (see major comment 3).*

We agree that the coarse spatial grouping limits the validity of affects the results to an extent, although it provides more comprehensive information than a similar box model approach. Unfortunately, this approach does assume correlation over large geographical regions that span differing socio-economic regimes. However, aggregation errors such as these are a known drawback of the methodology used in our work, and we discuss this in the main text. To reduce computational cost 5 regions were chosen, although we agree future studies using a similar approach could potentially seek to increase, or vary geographically, the number of regions chosen. The regions were chosen based on socio-economic background but also natural emission regions, and were partially derived by grouping regions of the existing Transcom basis function map (DeFries *et al.*, 1994). Increasing the number of regions used in the inversion would also likely reduce the constraint provided by the limited number of observations used in the study (see next response for more details), which we tried to avoid.

We have now included this caveat in the conclusion and detailed that posterior emissions within a domain are incorrectly assumed to have perfect correlation. We have included that this likely results in a positive bias within a domain being offset by a negative bias elsewhere in the domain. We have referenced our justification for the chosen regions in section 2, with reference to DeFries *et al.* (1994).

*As stated correctly on page 2 line 23, Rigby *et al.* (2017) and Turner *et al.* (2017) both conclude that the problem of the post 2007 methane rise may be under-constrained using the observed CH<sub>4</sub> concentrations, 13CH<sub>4</sub>/12CH<sub>4</sub> ratios and other tracers. Their conclusion is based on simpler box-model simulations without detailed regional division of CH<sub>4</sub> emissions. In the present study an even larger number of unknowns is optimised through the inversion. Wouldn't this mean that the individual elements of the state vector are even less well constraint? The authors should spend some time*

*justifying why their more detailed results should be better constrained than those from box-model analyses. In this context it may be worth looking at the covariances in the a posteriori emission and OH factor as well. Large negative covariances may indicate that the inversion cannot clearly distinguish between regions and sectors.*

As touched on in the previous response, the number of emission regions and sectors in this study were chosen in order to try to maintain a balance between learning as much as possible about the geographical distribution of the source/sink trends, whilst not under-constraining the posterior solution through use of too large a state vector. In the event, we generally match the number of observations and the number of elements in the state vector quite closely. Our study uses a larger number of regions and observations than previous “box model” studies, along with realistic atmospheric transport representation, and as such provides extra information concerning the distribution of source/sink changes. However, as indicated by our posterior errors and similarly to the other studies mentioned here, the uncertainty of our results is still relatively high, particularly for the OH sink term, and we discuss this in our conclusions.

To investigate this further we have now included some example error posterior correlations, new Figure 11, showing that the error correlations of the off-diagonals is relatively small and therefore, the results are well constrained.

*The authors base their inverse flux estimates on a limited set of surface observations (22 flask sampling sites). This may be justified in order to keep the influence of CH<sub>4</sub> concentrations to 13CH<sub>4</sub>/12CH<sub>4</sub> ratios similar, with the latter only being available at this limited number of locations. However, for validation purposes there would be many more CH<sub>4</sub> observations available worldwide (flask and continuous). These should be evaluated as independent observations as well and may better than GOSAT and TCON observations demonstrate the success of the inverse flux estimate.*

We agree that the inclusion of surface site observations for independent validation would improve the evaluation. We have added two independent site validations (new figure 5) for both CH<sub>4</sub> and  $\delta^{13}\text{CH}_4$ . As mentioned, the  $\delta^{13}\text{CH}_4$  observations are somewhat limited by the duration of the time series and this has been noted in the updated text.

*P2L26f: Although the global a priori emissions by source category are available in Table 1 and regionally divided a posteriori emissions are given in Table 4, I am missing the same kind of information for the a priori. An additional table in the style of Table 4 but for the a priori emissions should be added.*

We agree that extra detail on the prior can be added for completeness and have now added this to table 4 and updated the text to include this.

*P4L7ff: If I correctly understand the inversion setup, the inversion step is performed on batches of 12 months. Does this mean that the emissions from the previous year are not influenced by the observations of the next year at all? Meaning that January observations will not influence December emissions from the previous year? This would result in December, but probably also November and October, emissions always being constraint by less observations than emissions in other months and, therefore, probably are less corrected from their a priori values and/or show systematically larger a posteriori uncertainties than emissions in other months. Was this observed in the a posteriori factors?*

We agree that the nature of the experimental setup results in early year emissions being constrained by more observations than those later in the year. This has been investigated and the posterior error is found to be similar in the early months to the later months. As a result, we do not think the influence of few observations constraining posterior emissions later in the year is noticeable. We have added this to the text and explained that the posterior error for January emissions is similar in magnitude to the error for December emissions.

*P5L16: The wording is not very precise here. J is a cost function and the inversion will find its minimum. J is not a minimisation function. Instead equation 4 represents the analytical minimum of equation 3.*

We agree that the wording is not clear here and have updated the text before equation 3 to indicate that we calculate the cost function to quantify the optimisation and before equation 4 the text now indicates that the minimum is found using the Tarantola and Valette equation.

*P5L24: R is not the covariance matrix of the observations alone. R contains the observation/model mismatch covariance. Later this fact is taken care of by adding a model uncertainty to R, but it should be correctly introduced here.*

We agree and have added in that R includes both observation and model error.

*P6L6: Was any month-to-month variability of the emissions included in the a priori? If yes where was it taken from?*

We did not include details of this in the original text, but have now corrected the text in page 3 line 25 to comment that prior emissions vary at a monthly timescale.

*P6L10f: This is a bit simplistic since the model uncertainty most likely varies with the location of the observation and the question how representative the model grid cell can be for a given site. There have been many different approaches in the past on how to assign site-dependent model uncertainties and, hence, this point should be justified a bit more.*

As noted by reviewer 1 this detail was not included in the original submission, we have included a sentence acknowledging that the magnitude of transport uncertainty varies between sites but due to a lack of information we have taken the simple approach and assumed all uncertainties are equal.

*P7L6 and elsewhere: A lot of this RMSE is due to a bias in the a priori simulation. It would be better to calculate a bias-corrected RMSE instead. The bias could be mentioned separately. In general it would be nice to include all these comparison statistics in a table as well (in the main text for all discussed inversions and observational data sets and in the supplementary material for all sensitivity inversions).*

We agree that the high RMSE values are caused by the bias between the prior and observations. We have now included an explanation of this cause in elevated RMSE. We have also referenced it to Figures 1 to 4, showing the bias against both assimilated and non-assimilated observations. We have used RMSE and not bias-corrected RMSE because the bias is not constant and grows from zero at the start of the simulation. As a result the total offset contributes to the overall error and is reported.

*P7L23f: I don't think it is the model that is growing here. What about 'simulated atmospheric methane growth rates' instead?*

We agree the wording is much clearer as suggested and have made the recommended changes.

*P7L27f: This behaviour is very strange. For all other sites an increase in concentrations from a priori to a posteriori simulations was observed. Why not for Garmisch, a central European site not too far away from the Bremen site, where differences in the a priori and a posteriori simulations are as expected? One potential source of mismatch may be the location of Garmisch at the northern edge of the Alps, potentially introducing large mismatches due to smoothed model topography. Still this would not explain the lack of an increase from a priori to a posteriori. Although a detail, this needs to be checked again.*

We agree this mismatch is unusual and have since checked the data. We have spotted a coding error that led to this result and have now fixed it to present the actual posterior estimates and have updated the text and plots accordingly.



*P8L5 and Figure 5: The estimated a posteriori OH time series should also be compared with work by other authors (e.g. Rigby et al. 2017). If OH is really the main driver of the post 2007 CH<sub>4</sub> rise it would be good to know how TOMCAT OH compares to previous work.*

We agree that more detailed comparison with other work should be made. We have re-written section 3 and included detailed comparison with both the Rigby et al. and Turner et al. studies.

*P8L15: A reference to Table 6 should be added here.*

This section has been rewritten, but we have now referenced Table 6 in the equivalent section of the re-written version.

*P9L11: A reference to Figure 5 should be added here.*

This section has been rewritten, but we have now referenced Figure 5 (now 6) in the equivalent section of the re-written version.

*P9L28f: How similar? These numbers are not given anywhere. One can only guess them from the figures. A table (like Table 4) with the a posteriori emissions for the INVCL case should be provided and the same for all sensitivity inversion (supplement).*

We agree a quantitative description of the posterior estimates from the different sensitivities is important, as a result we have included Table 8, which provide these values.

*P9L28f: How is the a posteriori performance for this experiment (S4)? Just because one sensitivity run gives different a posteriori emissions it doesn't have to be wrong. But if it also fails to reproduce the observations, then the given conclusion may be correct.*

We agree that any single sensitivity test might provide a more realistic representation and therefore should not be discounted just because it is an outlier. Most of the sensitivities provide similar performance when compared with observations; with some exceptions. For S4 we isolate it as an anomaly due to the magnitude of the interannual variability, we consider annual energy sector variability for S4 to be too large to represent a realistic scenario. For example, in 2009 global energy sector emissions are around 3 times higher than the values for other years. We have added in this justification for our conclusion in the text.

*P10L31f: This sounds a bit like the authors of Rigby et al. worked on the current study as well. Which is not the case. This work may extend the previous work by using a more complex transport model, but other than that the approaches are fairly different and unrelated (inversion system, used observations, etc.). So I would not write that it extends the work of Rigby or others, but rather it adds to the results gained by others.*

We agree the wording is ambiguous and have clarified the text to now indicate that we added to the results from other studies.

*P11L7: 'larger errors'. What kind of errors? Needs to be repeated here.*

We agree this is also ambiguous, we have commented on the inversion being under constrained and the correlation with observations being reduced.

*P11L7f: The sentence 'The constraint improves when the  $\delta^{13}\text{CH}_4$  observations are introduced' should be re-written to be more precise. What about: 'The agreement of the simulations with observations improved when additional  $\delta^{13}\text{CH}_4$  observations are used to constrain CH<sub>4</sub> fluxes.'*

We agree the current structure does not explain the improvement, we have modified the text following the suggested re-write.

*P11L12: This conclusion is just based on the different trend compared with GOSAT, whereas the trend in surface observations was captured well in the a posteriori simulation. Does that mean that there is a potential trend in the bias between GOSAT and surface observations? Would there be any GOSAT validation studies that may provide some clarification?*

We have now extended the validation to apply not only to GOSAT, but also TCCON. This has been added to the results and conclusion, both in the text and figures. From this the posterior underestimates the growth in both GOSAT and TCCON, suggesting that there is no measurement bias in GOSAT. The reason for the bias between surface and column measurements is certainly interesting and might highlight column errors in the posterior, although potential bias in column observations might play a role. We have included this in the conclusion.

*P11L15f: Once again: There are more surface observations available than used in this study. They should be used for validation during this critical period.*

We have now included independent surface observations for validation.

*P11L29: It is unclear which period is referred to here? Table 5 suggests a growth rate in the energy sector of the AO region of 1.5 Tg yr<sup>-2</sup> the text states -2.2 Tg yr<sup>-2</sup>. What is correct?*

The text has now been updated, the text and table provide different values based on different time periods, 2003-2015 and 2003-2012.

*P12, 1st paragraph: This section should also repeat what was stated in the introduction concerning previous inverse modelling studies (P2L21ff), especially since the presented results contradict/correct these earlier findings.*

This discussion has now moved to the results section and details the comparison with existing studies in more depth to reflect what was in the introduction.

*Figure1: It is impossible to see the red dotted lines in many of the sub-panels (also the ones for  $\delta^{13}\text{CH}_4$ ). Either the figure needs to be enlarged/split or an additional color and solid line should be used for INV-CH<sub>4</sub>.*

We agree, and the plot has been updated with a new colour for the CH<sub>4</sub>-only inversion.

*Table1, Table4, Table6: These should also contain the uncertainty estimates.*

We agree that error values for table 1 and table 4 provide clear information on posterior uncertainties, for table 6 we have included the uncertainties more in the text and figures for clarity as the tables already contain a lot of information.

*Table1: Maybe I missed this before, but does the missing number for the soil sink mean that it was neglected completely? If it was only not-optimised its value should still be part of this table.*

We agree the model soil sink value should be given, we have added it to the table for the prior value; although because it is not optimised in the inversion we do not provide a posterior value.
